# Supplementary material for: Dietary phytochemical PEITC restricts tumor development via modulation of epigenetic writers and erasers
Source: PubMed Central journal article supplement (PMC5228035; doi:10.1038/srep40569), 2017-01-12
Supplement: srep40569-s1.pdf [file srep40569-s1.pdf]

## **Dietary phytochemical PEITC restricts tumor development via modulation of epigenetic writers and erasers**

*Jung Eun Park<sup>1</sup>, Sun Yang<sup>1</sup>, Sai Kiang Lim<sup>2</sup>, James P Tam<sup>1</sup>, Matthijs Dekker<sup>3</sup>, Hong Chen<sup>4</sup>, and Siu Kwan Sze<sup>1,\*</sup>*

### Supplementary Information

**Supplementary Figure 1.** Effects of PEITC on cell viability of colon cancer cells.

**Supplementary Figure 2.** Reduced growth of PEITC-treated tumors in a mouse xenograft model.

**Supplementary Table 1.** List of chromatin-associated proteins identified by ProteomeDiscoverer v1.4 search from 6-plex TMT experiment of 2.5  $\mu$ M PEITC- or DMSO-treated SW620 cells (excel file).

**Supplementary Table 2.** List of differentially regulated chromatinome after PEITC treatment for 6 weeks (excel file).

**Supplementary Table 3.** PEITC-induced differentially methylated genes in SW620 cells (excel file).

**Supplementary Table 4.** Lists of PEITC-, PRC1-, or PRC2 target genes and frequently methylated genes in cancer (excel file).

**Supplementary Table 5.** Common PEITC target genes which are overlapped with PRC1, PRC2, or frequently methylated cancer specific genes.

**Supplementary Table 6.** MeDIP primers.

**Supplementary Table 7.** Pro-apoptotic gene primers.

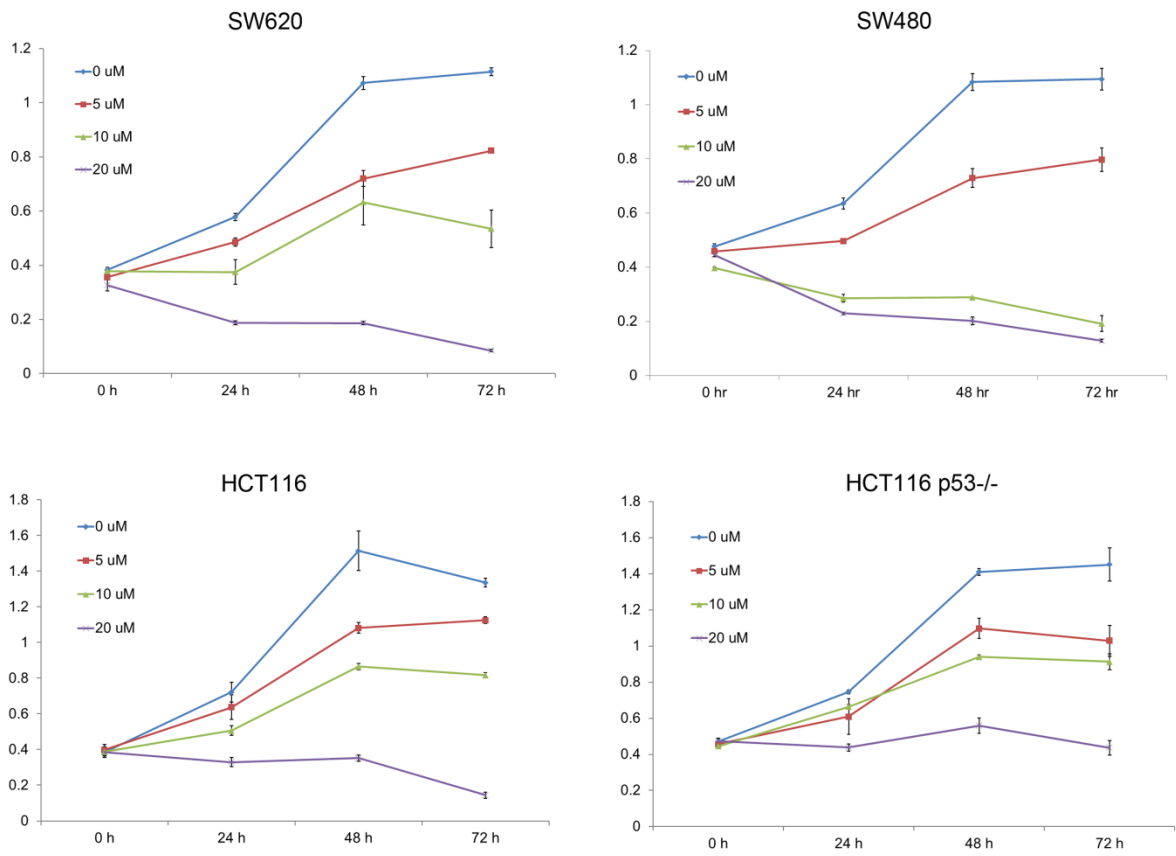

**Supplementary Figure 1.** Effects of PEITC on cell viability of colon cancer cells.

MTT assay showed cell viability of colon cancer cells after treatment with PEITC for the various time points. Error bars represent the mean  $\pm$  s.d. from three independent experiments.

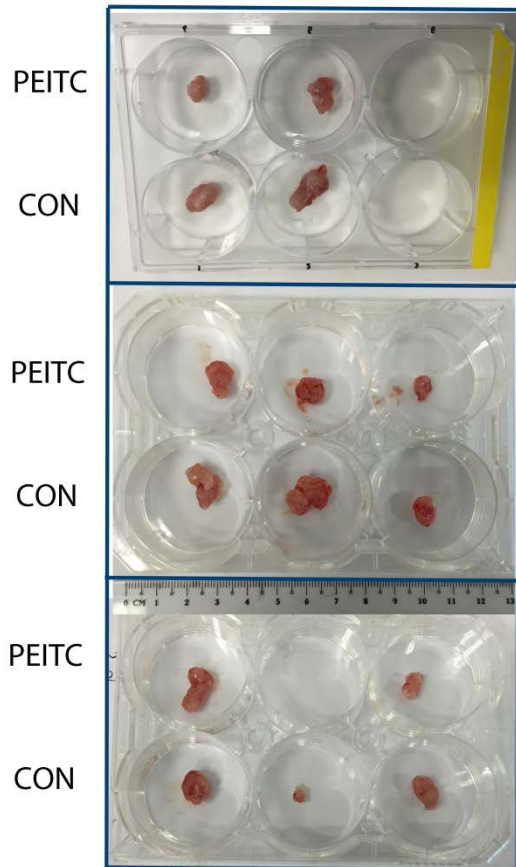

**Supplementary Figure 2.** Reduction of tumor formation in mouse xenograft model. Mouse xenograft model showed a reduction of tumor formation in SW620-PEITC cells compared to control cells. SW620 cells after treatment with DMSO (CON) or 2.5  $\mu$ M PEITC (PEITC) for 6 weeks were s.c. injected into left or right flank region of NCr nude mice.

**Supplementary Table 5.** Common PEITC target genes which are overlapped with PRC1, PRC2, or frequently methylated cancer specific genes

| Gene name | PEITC target | PRC2 target | PRC1 target | Frequently methylated gene |
|-----------|--------------|-------------|-------------|----------------------------|
| CDH8      | 0            | 0           |             |                            |
| DLC1      | 0            | 0           |             |                            |
| FEZ1      | 0            | 0           |             |                            |
| ITGA2     | 0            | 0           |             |                            |
| MGLL      | 0            | 0           |             |                            |
| PAX7      | 0            | 0           |             |                            |
| RASSF5    | 0            | 0           |             |                            |
| TFPI2     | 0            | 0           |             |                            |
| TRIM15    | 0            | 0           |             |                            |
| TRPM3     | 0            | 0           |             |                            |
| oSNL1     | 0            | 0           |             |                            |
| WNT5A     | 0            | 0           |             |                            |
| MORF4     | 0            | 0           |             |                            |
| HECW2     | 0            | 0           | 0           |                            |
| PAPPA     | 0            | 0           | 0           |                            |
| PRKCH     | 0            | 0           | 0           |                            |
| PTHLH     | 0            | 0           | 0           |                            |
| CFTR      | 0            | 0           |             | 0                          |
| FBN1      | 0            | 0           |             | 0                          |
| SFRP1     | 0            | 0           |             | 0                          |
| ALCAM     | 0            |             | 0           |                            |
| ALOX15    | 0            |             | 0           |                            |
| B4GALNT2  | 0            |             | 0           |                            |
| BAMBI     | 0            |             | 0           |                            |
| CACNA1A   | 0            |             | 0           |                            |
| CDH6      | 0            |             | 0           |                            |
| CR2       | 0            |             | 0           |                            |
| DLGAP2    | 0            |             | 0           |                            |
| DPP10     | 0            |             | 0           |                            |
| DSP       | 0            |             | 0           |                            |
| EBF2      | 0            |             | 0           |                            |
| ELAO4     | 0            |             | 0           |                            |
| EPHA3     | 0            |             | 0           |                            |
| ESRP1     | 0            |             | 0           |                            |
| EoX2      | 0            |             | 0           |                            |
| FAM46C    | 0            |             | 0           |                            |
| FLI1      | 0            |             | 0           |                            |
| GAD1      | 0            |             | 0           |                            |
| GALNT3    | 0            |             | 0           |                            |
| GRM8      | 0            |             | 0           |                            |
| HEPACAM2  | 0            |             | 0           |                            |
| HPSE2     | 0            |             | 0           |                            |

|          |   |   |   |
|----------|---|---|---|
| HSPB3    | 0 | 0 |   |
| KCNA3    | 0 | 0 |   |
| KCTD16   | 0 | 0 |   |
| KLHL29   | 0 | 0 |   |
| LHX5     | 0 | 0 |   |
| LRRCC1   | 0 | 0 |   |
| MAML3    | 0 | 0 |   |
| MECOM    | 0 | 0 |   |
| MSX1     | 0 | 0 |   |
| PAK7     | 0 | 0 |   |
| PAX3     | 0 | 0 |   |
| PCDH10   | 0 | 0 |   |
| PCDH17   | 0 | 0 |   |
| PCDH18   | 0 | 0 |   |
| PDE1A    | 0 | 0 |   |
| PEG3     | 0 | 0 |   |
| PTH2R    | 0 | 0 |   |
| RALYL    | 0 | 0 |   |
| RIMKLB   | 0 | 0 |   |
| RUNX1T1  | 0 | 0 |   |
| RUNX2    | 0 | 0 |   |
| SCGB3A2  | 0 | 0 |   |
| WNT8B    | 0 | 0 |   |
| ZIC4     | 0 | 0 |   |
| ADCYAP1  | 0 | 0 | 0 |
| EBF3     | 0 | 0 | 0 |
| GDNF     | 0 | 0 | 0 |
| GFI1     | 0 | 0 | 0 |
| HOXA11   | 0 | 0 | 0 |
| TMEFF2   | 0 | 0 | 0 |
| AFF3     |   |   | 0 |
| ASCL2    |   |   | 0 |
| COL1A2   |   |   | 0 |
| CSMD1    |   |   | 0 |
| DDIT3    |   |   | 0 |
| FGFR2    |   |   | 0 |
| FLRT2    |   |   | 0 |
| GABRB3   |   |   | 0 |
| HLA-DPB1 |   |   | 0 |
| HS3ST2   |   |   | 0 |
| MAGEA1   |   |   | 0 |
| MGMT     |   |   | 0 |
| MYLK     |   |   | 0 |
| PPP2R2B  |   |   | 0 |
| SFRP2    |   |   | 0 |
| SNRPN    |   |   | 0 |

---

**Supplementary Table 6. MeDIP primers**

| <b>Gene</b>       | <b>Forward (5'-3')</b>      | <b>Reverse (5'-3')</b>      |
|-------------------|-----------------------------|-----------------------------|
| <i>VWC2</i>       | TACATCAGAAACACGCCGGCCG      | CCTGCGGAGAGAACAGCAGCAC      |
| <i>PCDH10</i>     | TTCTTTGCGTCTGTCCCAGGCA      | ATTCACACTGTGTGGGCGCTCG      |
| <i>SPG20</i>      | ACTCCTTAGAGCTAGCACAAAGTTGA  | TGTTTGAAACAGGAAGCCTTTCTGT   |
| <i>PAK7</i>       | GTACGCAGCTGCTCCGGGTTTT      | TCCTCCCCACCTCTGCTAGCCT      |
| <i>CDH6</i>       | ACCTTCGCATCCCAAGAGCTGC      | AGAGCATCCCTCCCAACTCCGG      |
| <i>SOX3</i>       | GGGCTCTAGCTGGGCCCTTAT       | CGTGGACTCCCGCCTCCTAAGT      |
| <i>HNF4A</i>      | GAAGGCAGAGAGGGCACTGGGA      | CTGGCACACCTGGGCACATCTG      |
| <i>RASSF-5</i>    | TTA ATT ATT TCG ATT GAT TC  | CGA TAA CTC AAA TTC CAC G   |
| <i>MeDIP_H19</i>  | CGA GTG TGC GTG AGT GTG AG  | GGC GTA ATG GAA TGC TTG AA  |
| <i>MeDIP_CTRL</i> | GAG AGC ATT AGG GCA GAC AAA | GTT CCT CAG ACA GCC ACA TTT |

**Supplementary Table 7.** Pro-apoptotic gene primers

| <b>Gene</b> | <b>Forward (5'-3')</b>        | <b>Reverse (5'-3')</b>      |
|-------------|-------------------------------|-----------------------------|
| <i>BAK</i>  | ACA CTT GCT CCC AAC CCA TTC A | AAC CAA GTC CTA AGC CCT GT  |
| <i>BLK</i>  | ATC TTG ATG GAG ACC CTC CTG T | TCA CTG CCC TCC ATG CAT T   |
| <i>BMF</i>  | ACC AGC CAG GAA GAC AAA GCT   | CGA TAG CCA GCA TTG CCA TAA |
| <i>BAD</i>  | AGT GAC GAG TTT GTG GAC TCC T | AGC TTT GCC GCA TCT GCG TT  |
| <i>BIM</i>  | GTT GCT TTG CCA TTT GGT CT    | CCA CCA CTT GAT TCT TGC AG  |
